# Supplementary material for: The Role of N and S Doping on Photoluminescent Characteristics of Carbon Dots from Palm Bunches for Fluorimetric Sensing of Fe3+ Ion
Source: MDPI journal article supplement (doi:10.3390/ijms23095001), 2022-04-30
Supplement: s1 [file s1]

## Supporting Information

### **The role of N/S doping on photoluminescent characteristics of carbon dots from palm bunches for fluorimetric sensing of Fe<sup>3+</sup> ion**

Aphinan Saengsrirachan<sup>1</sup>, Chaiwat Saikate<sup>1</sup>, Peeranut Silasana<sup>1</sup>, Pongtanawat Khemthong<sup>2</sup>, Wanwitoo Wanmolee<sup>2</sup>, Jakkapop Phanthasri<sup>2</sup>, Saran Youngjan<sup>2</sup>, Pattaraporn Posoknistakul<sup>1</sup>, Sakhon Ratchahat<sup>1</sup>, Navadol Laosiripojana<sup>3</sup>, Kevin C.-W. Wu,<sup>4-6</sup> Chularat Sakdaronnarong<sup>1,\*</sup>

<sup>1</sup> Department of Chemical Engineering, Faculty of Engineering, Mahidol University, 25/25 Putthamonthon 4 Road, Salaya, Putthamonthon, Nakhon Pathom 73170 Thailand  
Tel: +66-28892138 ext. 6101-2, Fax: +662-44199731

<sup>2</sup> National Nanotechnology Center (NANOTEC), National Science and Technology Development Agency (NSTDA), Pathum Thani 12120, Thailand

<sup>3</sup> The Joint Graduate School of Energy and Environment, King Mongkut's University of Technology Thonburi, 126 Pracha Uthit Road, Bang Mot, Thung Khru, Bangkok 10140 Thailand

<sup>4</sup> Department of Chemical Engineering, National Taiwan University, No.1, Sec.4 Roosevelt Road, Taipei, 10617 Taiwan.

<sup>5</sup> Center of Atomic Initiative for New Materials (AI-MAT), National Taiwan University, Taipei 10617, Taiwan.

<sup>6</sup> International Graduate Program of Molecular Science and Technology, National Taiwan University (NTU-MST), Taipei 10617, Taiwan.

\*Corresponding email address: [chularat.sak@mahidol.ac.th](mailto:chularat.sak@mahidol.ac.th)

**Table S1.** Relative concentration of each chemical bond from deconvoluted peak from XPS measurement

| Elements | CDs     |                    | US-CDs                |                    | PTS-CDs           |                    |
|----------|---------|--------------------|-----------------------|--------------------|-------------------|--------------------|
|          | Bonds   | Atomic percent (%) | Bonds                 | Atomic percent (%) | Bonds             | Atomic percent (%) |
| C 1s     | O-C=O   | 51.99              | C-C/C=C               | 25.05              | C-C/C=C           | 13.08              |
|          | C-O     | 33.64              | C-N/C-S               | 46.56              | C-N/C-S           | 13.03              |
|          | C-C/C=C | 14.35              | C=O                   | 22.27              | C=O               | 26.42              |
|          |         |                    | C=N                   | 6.1                | C=N               | 47.46              |
| O 1s     | C=O     | 58.2               | C=O                   | 24.52              | C=O               | 45.16              |
|          | C-O-C   | 24.87              | C-O-C                 | 28.1               | C-O-C             | 41.47              |
|          | O=C-O   | 16.92              | O=C-O                 | 47.37              | O=C-O             | 13.36              |
| N 1s     |         |                    | N=C                   | 44.57              | N=C               | 62.13              |
|          |         |                    | C-N-C                 | 30.63              | C-N-C             | 29.43              |
|          |         |                    | N-H                   | 24.79              | N-H               | 8.43               |
| S 2p     |         |                    | C-SO <sub>x</sub> (1) | 67.84              | C-S-H             | 43.20              |
|          |         |                    | C-SO <sub>x</sub> (2) | 32.15              | C-S-C             | 35.30              |
|          |         |                    |                       |                    | C-SO <sub>x</sub> | 21.48              |

**Table S2.** The element composition by XPS, average diameter from HRTEM, and average hydrodynamic diameter from zeta sizer of CDs, 0.05 M NS/CDs, 0.10 M NS/CDs, 0.20 M NS/CDs, 0.30 M NS/CDs, 0.40 M NS/CDs, CDs/PtNPs, and CDs/AgNPs

| Materials     | Atomic concentration (%) |       |      |      | Average diameter from HRTEM (nm) | Average hydrodynamic diameter from zeta sizer (nm) |
|---------------|--------------------------|-------|------|------|----------------------------------|----------------------------------------------------|
|               | C 1s                     | O 1s  | N 1s | S 2p |                                  |                                                    |
| CDs pure      | 70.68                    | 27.25 | 2.06 | ND   | $6.99 \pm 1.69$                  | $1097.7 \pm 352.0$                                 |
| 0.05 M NS/CDs | 70.06                    | 24.97 | 2.58 | 2.38 | $9.46 \pm 3.08$                  | $604.9 \pm 169.7$                                  |
| 0.10 M NS/CDs | 76.65                    | 18.34 | 7.06 | 2.96 | $4.48 \pm 1.10$                  | $121.5 \pm 31.5$                                   |
| 0.20 M NS/CDs | 66.37                    | 25.9  | 4.2  | 3.53 | $4.91 \pm 1.10$                  | $1265.2 \pm 346.3$                                 |
| 0.30 M NS/CDs | 66.07                    | 20.51 | 5.78 | 7.65 | $5.77 \pm 0.90$                  | $2004.1 \pm 541.8$                                 |
| 0.40 M NS/CDs | 63.66                    | 26.49 | 3.49 | 6.36 | $20.41 \pm 2.74$                 | $5931.7 \pm 772.0$                                 |

ND = not detected

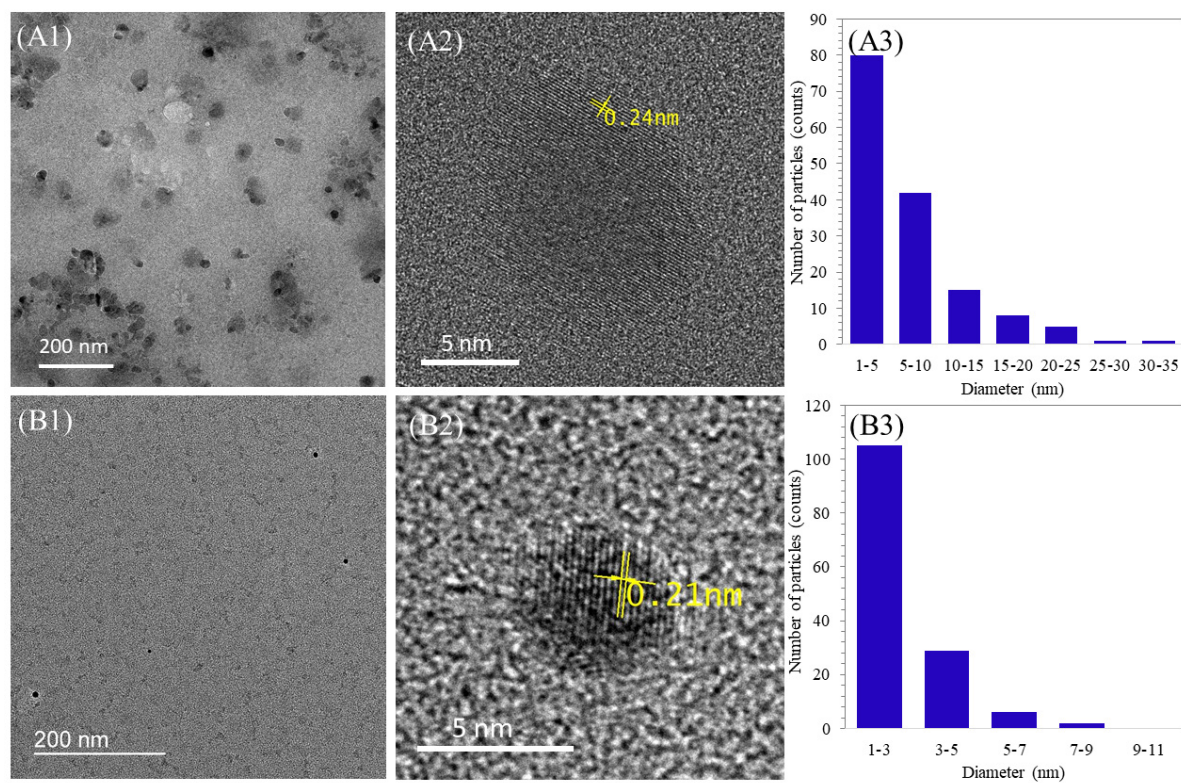

**Figure S1** HRTEM images of synthesized CDs at  $\times 120,000$ ,  $\times 300,000$  magnifications and size distribution of (A) 220C 6 h EFB derived CDs, (B) 220C 10 h EFB derived CDs, (C) 220C 6H US-CDs, and (D) 220C 6H PNa-CDs.

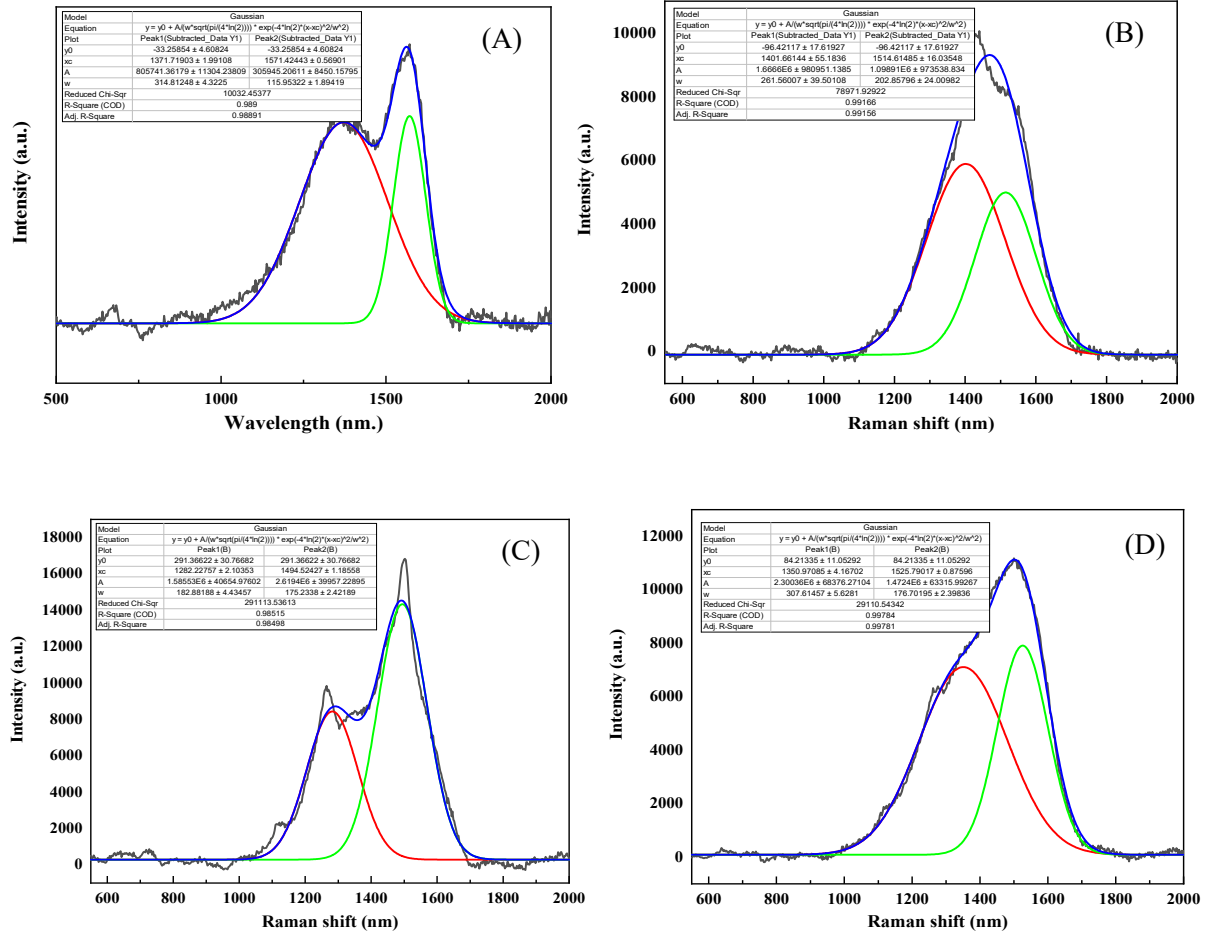

**Figure S2** Deconvoluted Raman spectra for Id/IG ratio calculation of (A) CDs, (B) P-CDs, (C) PTS-CDs, and (D) PTS-CDs/Fe<sup>3+</sup> (or 0.20 M NS/CDs)

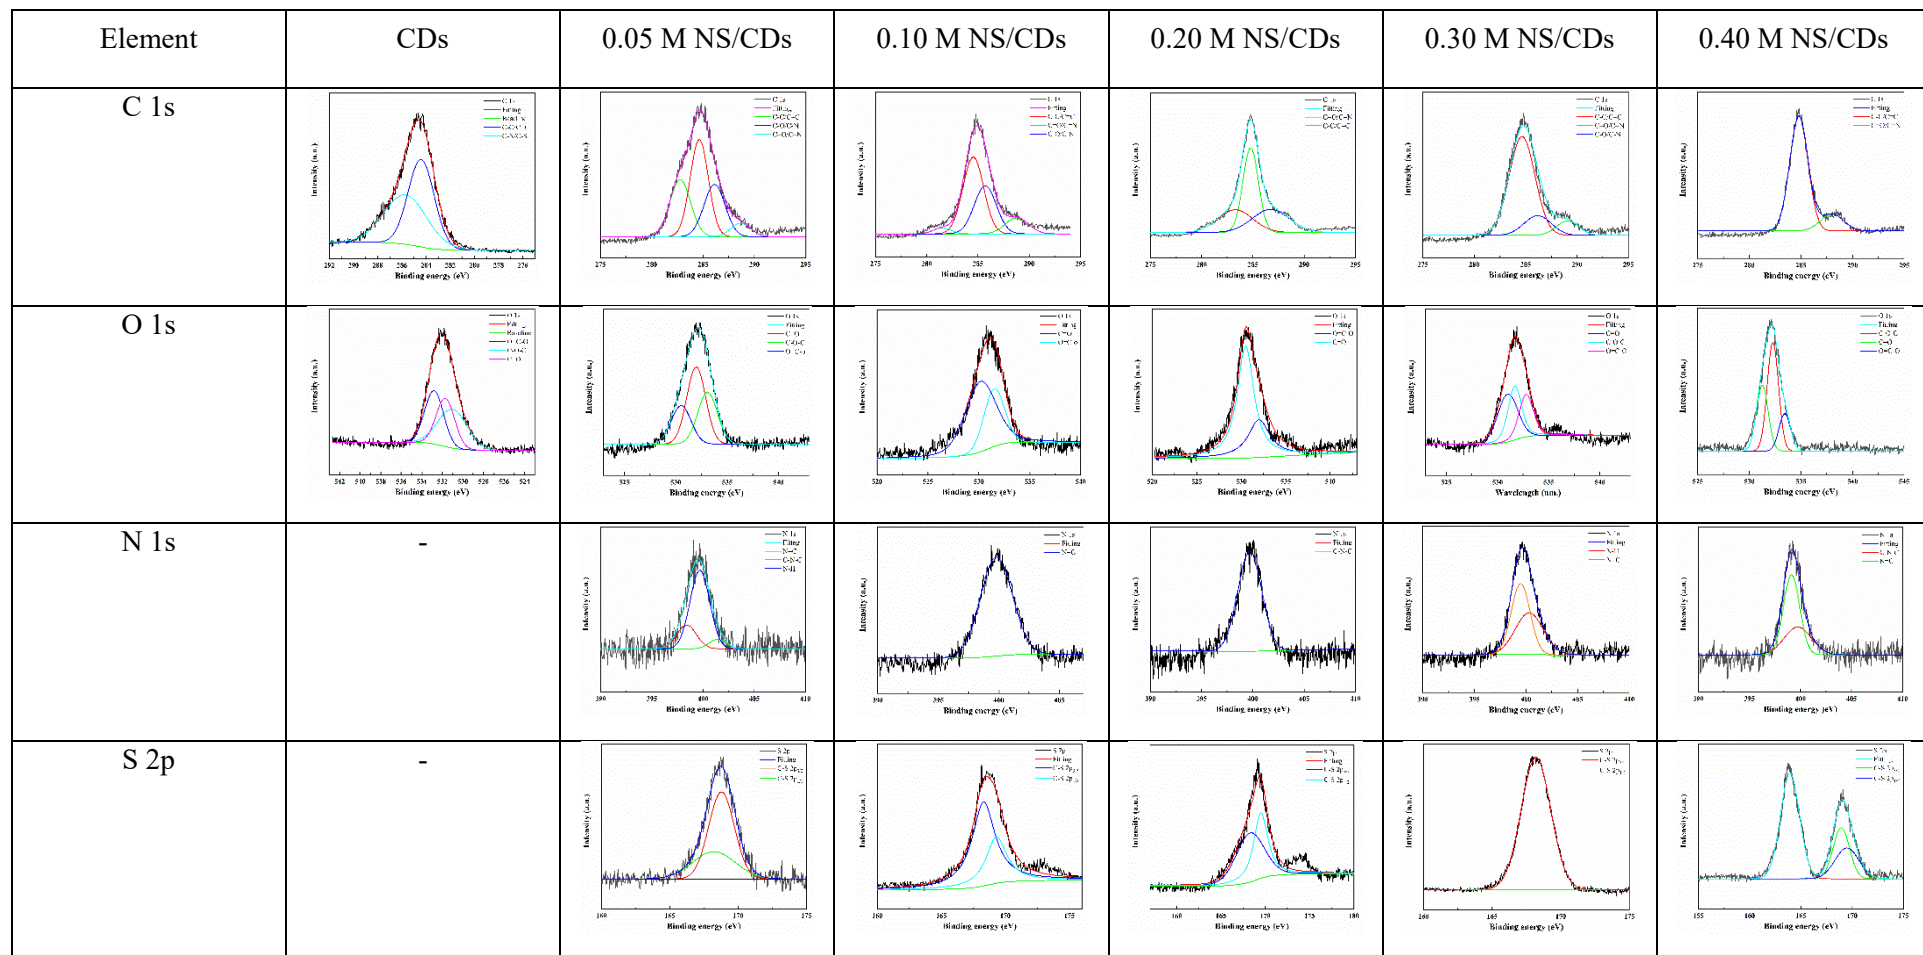

**Figure S3.** High resolution XPS spectra of CDs, 0.05M NS/CDs, 0.10M NS/CDs, 0.20M NS/CDs, 0.30M NS/CDs, and 0.40M NS/CDs for their C1s, O1s, N1s, and S2p
